# Supplementary material for: Development and validation of a multiplex bead assay for measuring growth mediators in wound fluid
Source: Royal Society of Chemistry journal article supplement (doi:10.1039/b911863b), 2009-11-17
Supplement: b911863b.pdf [file b911863b.pdf]

**Supplemental Data Table1. Growth mediators and antibodies (Ab)**

| Mediators | Factors/ Ab     | Type                | Supplier                                |
|-----------|-----------------|---------------------|-----------------------------------------|
| Ang-1     | rhVEGF          |                     | R&D Systems Europe Ltd., Abingdon, UK   |
|           | capture Ab      | mouse mAb           |                                         |
|           | biotinylated Ab | goat polyclonal IgG |                                         |
| VEGF      | rhVEGF          |                     | R&D Systems                             |
|           | capture Ab      | mouse mAb           |                                         |
|           | biotinylated Ab | goat polyclonal IgG |                                         |
| BMP-2     | rhBMP-2         |                     | R&D systems                             |
|           | capture Ab      | mouse mAb           |                                         |
|           | biotinylated Ab | rabbit polyclonal   | Insight Biotechnology Ltd., Wembley, UK |
| OPG       | rhOPG           |                     | Insight Biotechnology Ltd.              |
|           | capture Ab      | mouse mAb           |                                         |
|           | biotinylated Ab | rabbit polyclonal   |                                         |
| TIMP-1    | rhTIMP-1        |                     | R&D Systems                             |
|           | capture Ab      | mouse mAb           |                                         |
|           | biotinylated Ab | goat polyclonal IgG |                                         |
| bFGF      | rhbFGF          |                     | R&D Systems                             |
|           | capture Ab      | mouse mAb           |                                         |
|           | biotinylated Ab | goat polyclonal IgG |                                         |
| KGF       | rhKGF           |                     | Amgen Inc., Thousand Oaks, CA, USA      |
|           | capture Ab      | mouse mAb           |                                         |
|           | biotinylated Ab | mouse mAb           |                                         |
| PDGF      | rhPDGF          |                     | R&D Systems                             |
|           | capture Ab      | mouse mAb           |                                         |
|           | biotinylated Ab | goat polyclonal IgG |                                         |

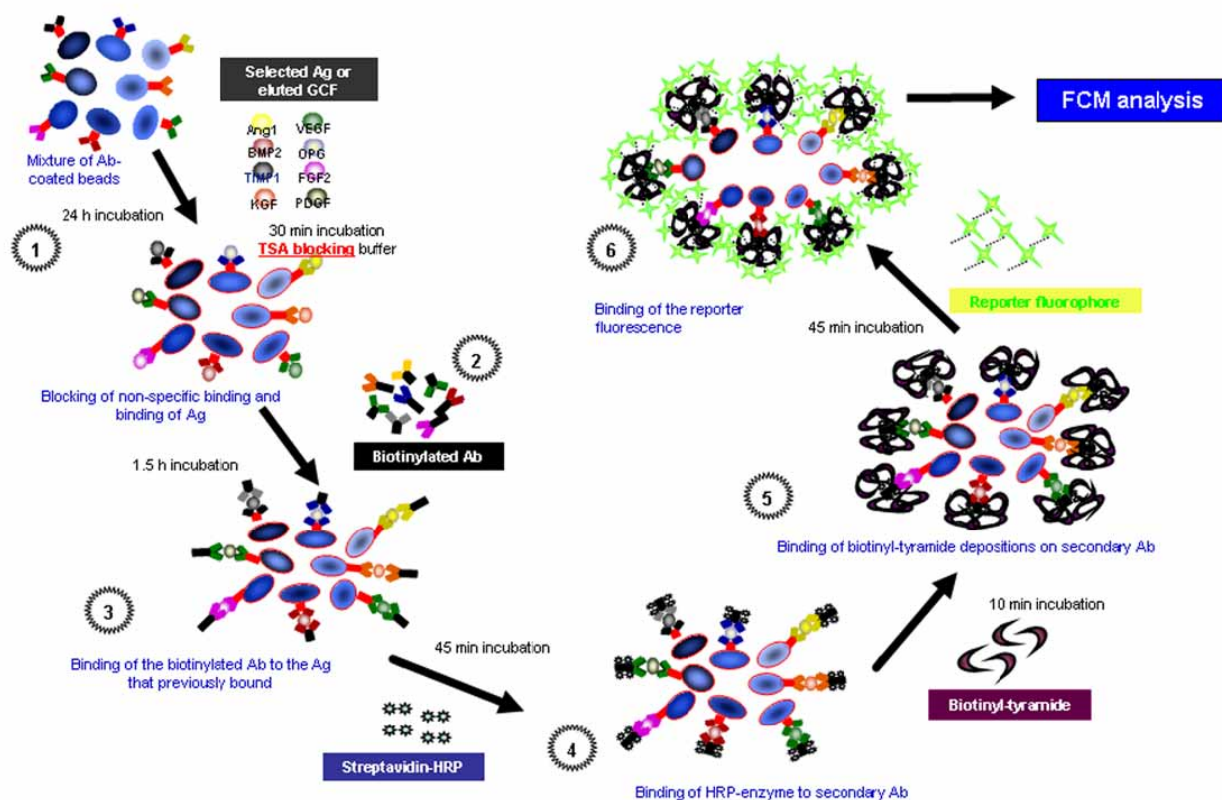

**Supplemental Data Figure 1. Schematic illustration of the MBA procedure**

1) A mixture of Ab-coated beads is incubated with a mixture of Ag, followed by the TSA-blocking buffer. 2) A cocktail of biotinylated Ab is added. 3) Binding of secondary Ab to the Ag that had previously bound. 4) Addition of streptavidin-HRP. 5) Addition of the biotinyl-tyramide. 6) The biotin is 'tagged' by the reporter fluorophore and analysed by FCM.
